# Supplementary material
Source: publisher figshare collection journal article supplement (https://tandf.figshare.com/ndownloader/files/21874875)
Supplement: Supplementary file 1 [file 21874875]

1  
2  
3  
4  
5  
6  
7  
8  
9  
10  
11  
12  
13  
14  
15  
16  
17  
18  
19  
20  
21  
22  
23  
24  
25  
26  
27  
28  
29  
30  
31  
32  
33  
34  
35  
36  
37  
38  
39  
40  
41  
42  
43  
44  
45  
46  
47  
48  
49  
50  
51  
52  
53  
54  
55  
56  
57  
58  
59  
60

**SUPPLEMENTARY TABLES**

Table S1. Number of persons treated with biologics by year among 10,302 incident patients with Crohn’s disease (CD) and 22,144 incident patients with ulcerative colitis (UC) in Denmark, 2003-2016

|                                                  | 2003  | 2004  | 2005  | 2006  | 2007  | 2008  | 2009   | 2010   | 2011   | 2012   | 2013   | 2014   | 2015   | 2016  | Total  |
|--------------------------------------------------|-------|-------|-------|-------|-------|-------|--------|--------|--------|--------|--------|--------|--------|-------|--------|
| CD patients treated with biologics               | 0     | 7     | 32    | 90    | 248   | 399   | 566    | 777    | 923    | 1,121  | 1,260  | 1,447  | 1,571  | 1,680 | 2,939  |
| Incident CD population, cumulated                | 771   | 1,582 | 2,368 | 3,090 | 3,839 | 4,601 | 5,328  | 6,162  | 6,985  | 7,760  | 8,464  | 9,148  | 9,646  |       | 10,302 |
| % of incident CD patients treated with biologics | 0%    | 0%    | 1%    | 3%    | 6%    | 9%    | 11%    | 13%    | 13%    | 14%    | 15%    | 16%    | 16%    |       | 29%    |
| UC patients treated with biologics               | 0     | <5    | 5     | 38    | 113   | 174   | 258    | 353    | 482    | 603    | 699    | 890    | 986    | 1,020 | 2,504  |
| Incident UC population, cumulated                | 1,681 | 3,429 | 5,114 | 6,713 | 8,258 | 9,919 | 11,748 | 13,519 | 15,401 | 16,883 | 18,244 | 19,437 | 20,321 |       | 22,144 |
| % of incident UC patients treated with biologics | 0%    | -     | 0%    | 1%    | 1%    | 2%    | 2%     | 3%     | 3%     | 4%     | 4%     | 5%     | 5%     |       | 11%    |

Note: The share is calculated as share of cumulated incident patients alive primo in the given year. A person is included if they receive biologic treatment in the given calendar year. The total shows the share of the patient populations incident in 2003-2015 who received treatment with biologics at any point during the study period 2003-2016.

Table S2. Number of patients initiating biologic treatment each year among 10,302 incident patients with Crohn's disease (CD) and 22,144 incident patients with ulcerative colitis (UC) in Denmark, 2003-2016

|                                                | 2003  | 2004  | 2005  | 2006  | 2007  | 2008  | 2009   | 2010   | 2011   | 2012   | 2013   | 2014   | 2015   | 2016 | Total  |
|------------------------------------------------|-------|-------|-------|-------|-------|-------|--------|--------|--------|--------|--------|--------|--------|------|--------|
| CD patients initiating biologic treatment      | 0     | 7     | 27    | 73    | 202   | 209   | 248    | 308    | 296    | 329    | 300    | 357    | 369    | 214  | 2,939  |
| Incident CD population, cumulated              | 771   | 1,582 | 2,368 | 3,090 | 3,839 | 4,601 | 5,328  | 6,162  | 6,985  | 7,760  | 8,464  | 9,148  | 9,646  |      | 10,302 |
| % of incident CD patients initiating biologics | 0%    | 0%    | 1%    | 2%    | 5%    | 5%    | 5%     | 5%     | 4%     | 4%     | 4%     | 4%     | 4%     |      | 29%    |
| UC patients initiating biologic treatment      | 0     | <5    | <5    | 37    | 101   | 123   | 177    | 222    | 274    | 277    | 300    | 382    | 371    | 235  | 2,504  |
| Incident UC population, cumulated              | 1,681 | 3,429 | 5,114 | 6,713 | 8,258 | 9,919 | 11,748 | 13,519 | 15,401 | 16,883 | 18,244 | 19,437 | 20,321 |      | 22,144 |
| % of incident UC patients initiating biologics | 0%    | -     | -     | 1%    | 1%    | 1%    | 2%     | 2%     | 2%     | 2%     | 2%     | 2%     | 2%     |      | 11%    |

Note: The population includes incident patients with CD or UC. A person is counted if they initiated biologic treatment in the given calendar year, but after their IBD diagnosis.

Table S3. Time from diagnosis to first treatment with biologics among 2,939 incident patients with Crohn's disease (CD) and 2,504 incident patients with ulcerative colitis (UC) in Denmark treated with biologics in 2003-2016.

|                       | Within 1 year | 1-2 years | 2-3 years | 3-4 years | 4-5 years | 5-6 years | 6-7 years | 7-8 years | 8-9 years | 9-10 years | 10+ years | Total |
|-----------------------|---------------|-----------|-----------|-----------|-----------|-----------|-----------|-----------|-----------|------------|-----------|-------|
| Number of CD patients | 1,358         | 479       | 261       | 201       | 172       | 122       | 97        | 77        | 58        | 44         | 70        | 2,939 |
| % of CD patients      | 46%           | 16%       | 9%        | 7%        | 6%        | 4%        | 3%        | 3%        | 2%        | 1%         | 2%        | 100%  |
| Number of UC patients | 1,132         | 387       | 228       | 176       | 166       | 117       | 73        | 66        | 60        | 33         | 66        | 2,504 |
| % of UC patients      | 45%           | 15%       | 9%        | 7%        | 7%        | 5%        | 3%        | 3%        | 2%        | 1%         | 3%        | 100%  |

Note: The population includes incident patients with CD or UC who initiated biologic treatment.

1  
2  
3  
4  
5  
6  
7  
8  
9  
10  
11  
12  
13  
14  
15  
16  
17  
18  
19  
20  
21  
22  
23  
24  
25  
26  
27  
28  
29  
30  
31  
32  
33  
34  
35  
36  
37  
38  
39  
40  
41  
42  
43  
44  
45  
46  
47  
48  
49  
50  
51  
52  
53  
54  
55  
56  
57  
58  
59  
60

1 Table S4. Months between last treatment in treatment line one and first treatment in treatment line  
2 two among 1,017 incident patients with Crohn’s disease (CD) and 581 incident patients with  
3 ulcerative colitis (UC) in Denmark treated with more than 1 biologic therapy in 2003-2016.

| Months     | CD patients | UC patients | CD, cumulative | UC, cumulative |
|------------|-------------|-------------|----------------|----------------|
| [0-1[      | 32.4%       | 34.4%       | 32.4%          | 34.4%          |
| [1-2[      | 24.4%       | 33.7%       | 56.7%          | 68.2%          |
| [2-3[      | 9.1%        | 9.1%        | 65.9%          | 77.3%          |
| [3-4[      | 6.6%        | 3.3%        | 72.5%          | 80.5%          |
| [4-5[      | 3.5%        | 1.9%        | 76.0%          | 82.4%          |
| [5-6[      | 3.2%        | 2.9%        | 79.3%          | 85.4%          |
| [6-7[      | 1.8%        | 1.0%        | 81.0%          | 86.4%          |
| [7-8[      | 1.0%        | 1.4%        | 82.0%          | 87.8%          |
| [8-9[      | 1.1%        | 0.5%        | 83.1%          | 88.3%          |
| [9-10[     | 1.8%        | 1.2%        | 84.9%          | 89.5%          |
| [10-11[    | 1.4%        | 0.9%        | 86.2%          | 90.4%          |
| [11-12[    | 0.8%        | 1.0%        | 87.0%          | 91.4%          |
| 12 or more | 13.0%       | 8.6%        | 100.0%         | 100.0%         |
| Total      | 100.0%      | 100.0%      |                |                |

4 Note: The population includes incident patients with CD or UC who received treatment with more than one biologic  
5 therapy.
